# Supplementary material for: A Strategy to Deliver Precise Oral Doses of the Glucosinolates or Isothiocyanates from Moringa oleifera Leaves for Use in Clinical Studies
Source: PubMed Central journal article supplement (PMC6682957; doi:10.3390/nu11071547), 2019-07-09

## Supplementary Information for:

### **A Strategy to Deliver Precise Oral Doses of the Glucosinolates or Isothiocyanates from *Moringa oleifera* Leaves for Use in Clinical Studies**

Jed W. Fahey<sup>1,2,3,4 \*</sup>, Kristina L. Wade<sup>1,3</sup>, Katherine K. Stephenson<sup>1,3</sup>, Yuzhu Shi<sup>1</sup>, Hua Liu<sup>1,3</sup>, Anita A. Panjwani<sup>1,4</sup>, Collin R. Warrick<sup>1,3</sup>, Mark E. Olson<sup>5,6</sup>

<sup>1</sup> Cullman Chemoprotection Center, Johns Hopkins University, Baltimore, Maryland, 21205 USA

<sup>2</sup> Johns Hopkins University School of Medicine, Department of Medicine, Division of Clinical Pharmacology, Baltimore, Maryland, 21205 USA

<sup>3</sup> Johns Hopkins University School of Medicine, Department of Pharmacology and Molecular Sciences, Baltimore, Maryland, 21205 USA

<sup>4</sup> Johns Hopkins University Bloomberg School of Public Health, Department of International Health, Center for Human Nutrition, Baltimore, Maryland, 21205 USA

<sup>5</sup> Instituto de Biología, Universidad Nacional Autónoma de México, Tercer Circuito de Ciudad Universitaria, Ciudad de México 04510, Mexico

<sup>6</sup> The International Moringa Germplasm Collection, Jalisco, Mexico

\*Address for Correspondence: Dr. Jed W. Fahey, Cullman Chemoprotection Center, 855 N. Wolfe St., Suite 625, Baltimore, Maryland, USA 21205. (jfahey@jhmi.edu)

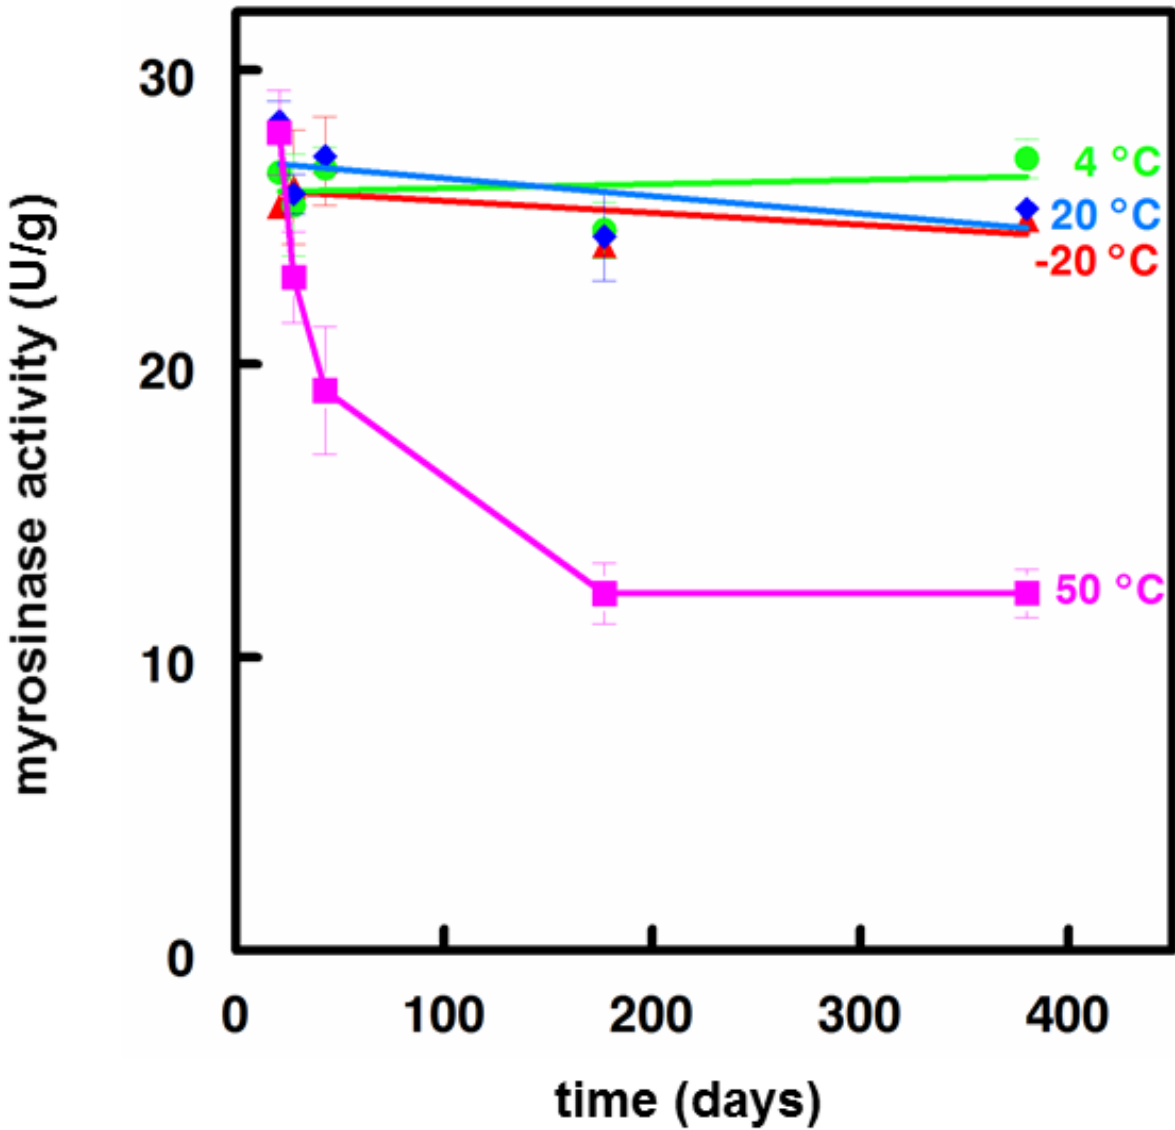

**Supplemental Figure S1.** Effect of storage temperature on myrosinase activity. Ground broccoli seed meal was stored at -20 °C (▲), 4 °C (●), 20 °C (◆), and 50 °C (■) and the myrosinase activity tested at intervals over almost 400 days. There was almost no reduction in myrosinase activity at any of the storage temperatures except 50 °C, at which activity was approximately halved within the first 6 months and stable thereafter. (Error bars are SD; n = 3).

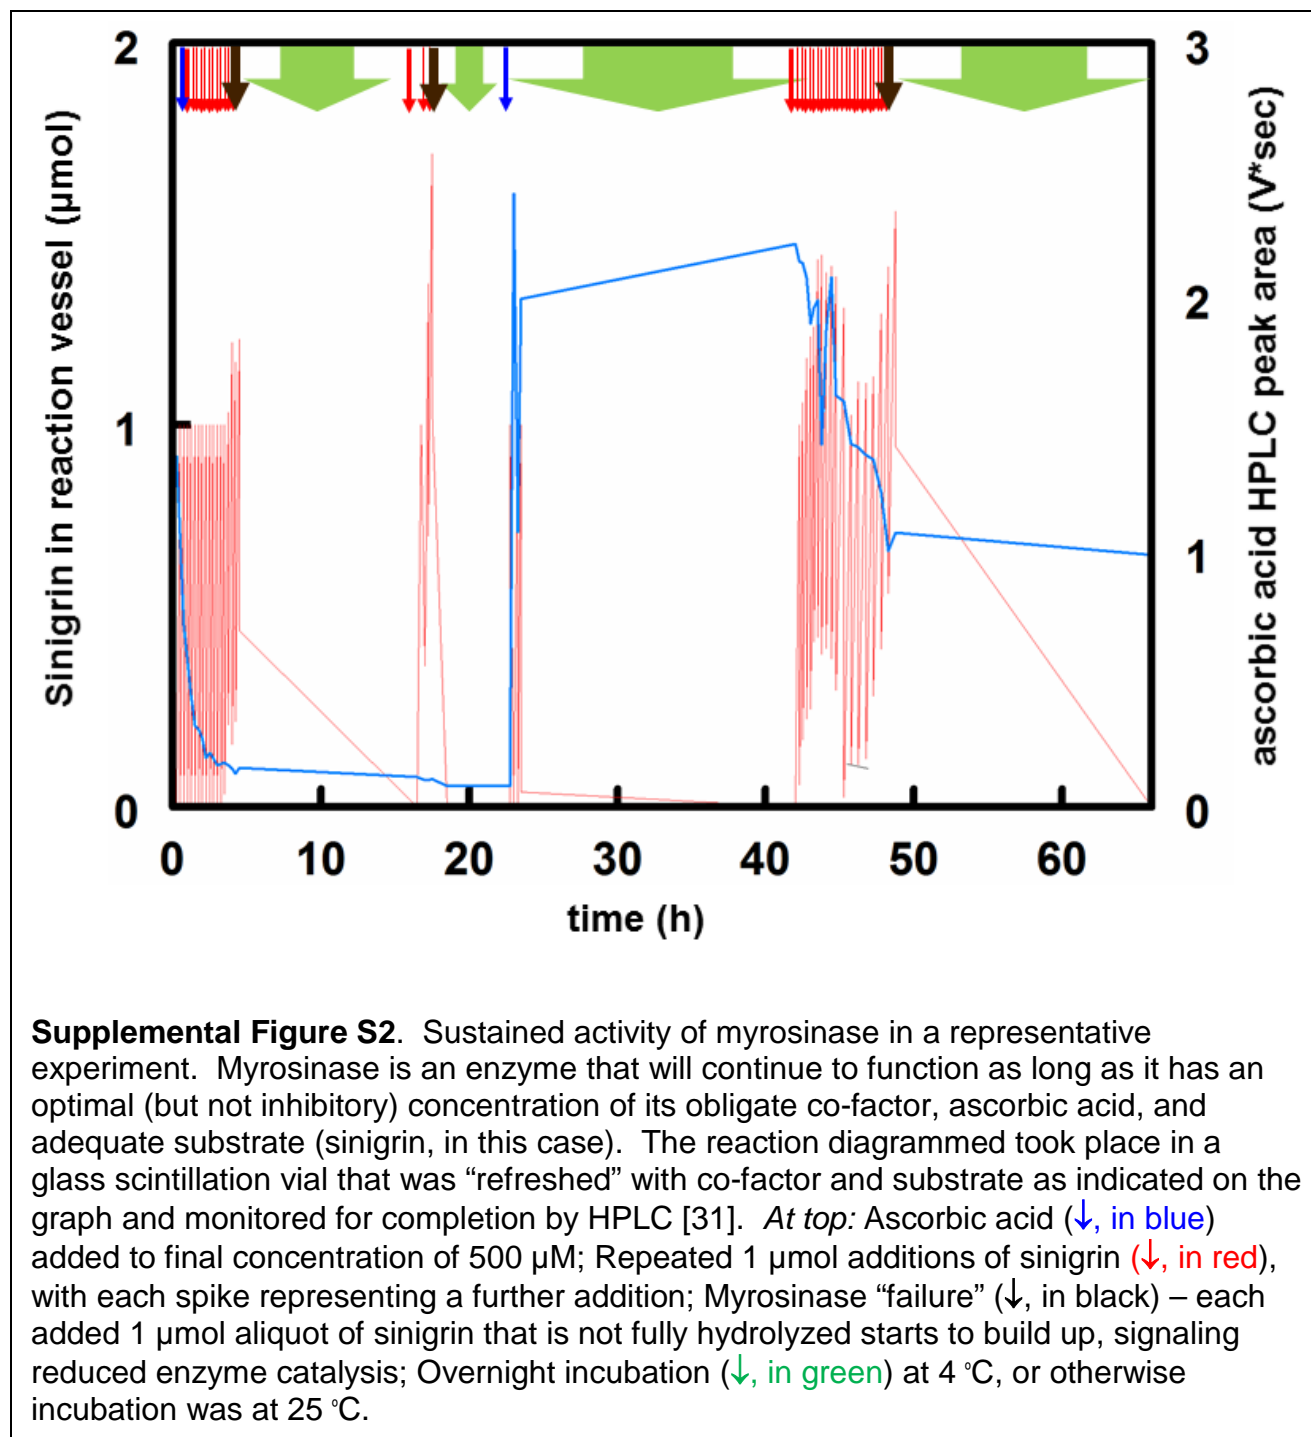

Supplement: nutrients-11-01547-s001.pdf [file nutrients-11-01547-s001.pdf]
